# Supplementary material for: Ultrasensitive detection of lung cancer-associated miRNAs by multiple primer-mediated rolling circle amplification coupled with a graphene oxide fluorescence-based (MPRCA-GO) sensor
Source: Royal Society of Chemistry journal article supplement (doi:10.1039/c9an00517j), 2019-01-01
Supplement: c9an00517j1.pdf [file c9an00517j1.pdf]

Supplementary Information

## Ultrasensitive detection of lung cancer-associated miRNAs by multiple primers-mediated rolling circle amplification coupled with a graphene oxide fluorescence-based (MPRCA-GO) sensor

Krissana Khoothaim<sup>a,b,c</sup>, Kiatnida Treerattrakoon<sup>d</sup>, Tawin Iempridee<sup>d</sup>, Patraporn Luksirikul<sup>e,f</sup>, Tararaj Dharakul<sup>\*b</sup> and Deanpen Japrun<sup>\*d</sup>

<sup>a</sup>Graduate Program in Immunology, Department of Immunology, Faculty of Medicine Siriraj Hospital, Mahidol University, Bangkok, Thailand.

<sup>b</sup>Department of Immunology, Faculty of Medicine Siriraj Hospital, Mahidol University, Bangkok, Thailand

<sup>c</sup>Division of Microbiology and Parasitology, School of Medical Science, University of Phayao, Phayao, Thailand

<sup>d</sup>National Nanotechnology Center (NANOTEC), National Science and Technology Development Agency (NSTDA), Thailand Science Park, Pathumthani, Thailand

<sup>e</sup>Department of Chemistry, Faculty of Science, Kasetsart University, Bangkok, Thailand

<sup>f</sup>Center for Advanced Studies in Nanotechnology for Chemical, Food and Agricultural Industries, KU Institute for Advanced Studies, Kasetsart University, Bangkok, Thailand

\*Corresponding author: Deanpen Japrun

Email address: [deanpen@nanotec.or.th](mailto:deanpen@nanotec.or.th)

\*Corresponding author: Tararaj Dharakul

Email address: [tararaj.dha@mahidol.ac.th](mailto:tararaj.dha@mahidol.ac.th)

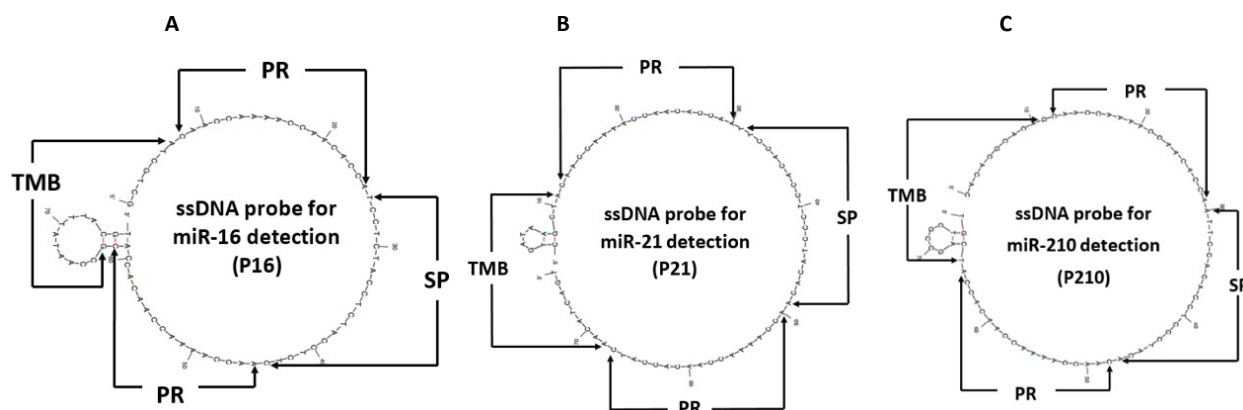

**Fig. S1** Secondary structure of ssDNA probe for miR-16 (A), miR-21 (B) and miR-210 (C) detection predicted by using Mfold software analysis. TMB, PR and SP represent target miRNA binding site, primer binding region and signaling probe identical sequence, respectively.

A

B

## Supplementary Information

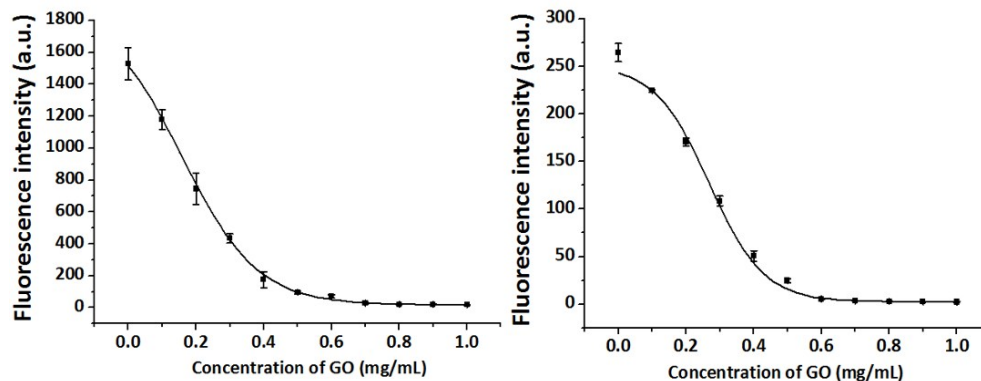

**Fig.S2** Effect of GO concentration on the fluorescence intensity of fluorescence labelled ssDNA tag. (A) and (B) are the fluorescence intensity of Cy5-FP and ROX-FP, respectively, in the presence of GO concentration between 0 and 1 mg/mL. The fluorescence spectra of Cy5 and ROX were individually excited and emitted at 630/670 nm and 570/610 nm, respectively.

**Table S1.** Comparison of sensitivity by different isothermal miRNA detection methods

| Limit of detection | Linear rang      | Detection methods                                                                     | References                         |
|--------------------|------------------|---------------------------------------------------------------------------------------|------------------------------------|
| 0.4 pM             | 1 fM - 50 pM     | RCA combined with GO-based fluorometric assay                                         | Hong et al. (2016) <sup>1</sup>    |
| 0.38 pM            | 1 pM - 10 nM     | Hairpin probe-mediated circular exponential isothermal amplification (EXPAR)          | Wang and Zhang (2012) <sup>2</sup> |
| 290 fM             | 0.5 pM - 12.5 nM | Electrochemical biosensor coupled with hairpin probe-mediated RCA                     | Li et al. (2018) <sup>3</sup>      |
| 10 fM              | 0.025 - 1 pM     | Branched-RCA (BRCA)                                                                   | Cheng et al. (2009) <sup>4</sup>   |
| 10 fM              | 0.2 fM - 1 nM    | Hairpin probe-mediated RCA                                                            | Li et al. (2013) <sup>5</sup>      |
| 1.67 fM            | 5 fM - 50 pM     | Electrochemiluminescent biosensor coupled with hybridization chain reaction and hemin | Zhang et al. (2014) <sup>6</sup>   |
| 1 fM               | 1 fM - 100 nM    | Ramification amplification (RAM)                                                      | Yao et al. (2009) <sup>7</sup>     |
| 0.87 fM            | 1 fM - 10 pM     | MPRCA coupled with GO-sensing biosensor                                               | This study                         |
| 0.68 fM            | 1 fM - 1 pM      | RCA-mediated DNA machine                                                              | Zhuang et al. (2014) <sup>8</sup>  |
| 0.02 fM            | 0.02-75 fM       | BRCA combined with bioluminescent pyrophosphate detection                             | Mashimo et al. (2011) <sup>9</sup> |

## References

1. C. Hong, A. Baek, S. S. Hah, W. Jung and D. E. Kim, *Anal Chem*, 2016, **88**, 2999-3003.
2. G.-I. Wang and C.-y. Zhang, *Analytical Chemistry*, 2012, **84**, 7037-7042.
3. Q. Li, F. Zeng, N. Lyu and J. Liang, *Analyst*, 2018, **143**, 2304-2309.
4. Y. Cheng, X. Zhang, Z. Li, X. Jiao, Y. Wang and Y. Zhang, *Angewandte Chemie (International ed. in English)*, 2009, **48**, 3268-3272.
5. Y. Li, L. Liang and C.-y. Zhang, *Analytical Chemistry*, 2013, **85**, 11174-11179.
6. P. Zhang, X. Wu, Y. Chai and R. Yuan, *Analyst*, 2014, **139**, 2748-2753.
7. B. Yao, J. Li, H. Huang, C. Sun, Z. Wang, Y. Fan, Q. Chang, S. Li and J. Xi, *Rna*, 2009, **15**, 1787-1794.
8. J. Zhuang, W. Lai, G. Chen and D. Tang, *Chemical communications (Cambridge, England)*, 2014, **50**, 2935-2938.
9. Y. Mashimo, M. Mie, S. Suzuki and E. Kobatake, *Analytical and Bioanalytical Chemistry*, 2011, **401**, 221-227.
